# Supplementary material
Source: MDPI journal article supplement (https://www.mdpi.com/2308-3417/9/2/41)
Supplement: s1 [file s1]

Supplementary Table S1. Characteristics of the sample related to FHPAST. Qualitative variables are expressed as percentages.

| FHPAST components                              | Variables                                                           | Prefrail group<br>(N= 57/140) | Frail group<br>(N= 83/140) | <i>P value</i> |
|------------------------------------------------|---------------------------------------------------------------------|-------------------------------|----------------------------|----------------|
|                                                |                                                                     | n (%)                         | n (%)                      |                |
| FHPAST – C1 <sup>a</sup><br>Health Risk/Threat | C1.1 I fear for my safety                                           | 31 (54)                       | 42 (51)                    | 0.436          |
|                                                | C1.2 I feel at risk for physical harm                               | 22 (39)                       | 23 (28)                    | 0.185          |
|                                                | C1.3 I have difficulty urinating                                    | 12 (21)                       | 42 (51)                    | <0.001         |
|                                                | C1.4 I feel unusual physical symptoms with walking                  | 8 (14)                        | 78 (94)                    | <0.001         |
|                                                | C1.5 I use recreational drugs                                       | 0                             | 0                          | 0              |
|                                                | C1.6 I have problems with bowel elimination                         | 9 (16)                        | 20 (24)                    | 0.223          |
|                                                | C1.7 My physical abilities limit my activities of daily living      | 20 (35)                       | 62 (75)                    | <0.001         |
|                                                | C1.8 I experience pain that interrupts my daily activities          | 18 (32)                       | 43 (52)                    | 0.016          |
|                                                | C1.9 When I drink alcohol, wine, or beer, I feel guilty             | 0                             | 0                          | 0              |
|                                                | C1.10 I have difficulty controlling my anger                        | 8 (14)                        | 8 (10)                     | 0.440          |
|                                                | C1.11 I have family problems that I find difficult to handle        | 17 (30)                       | 22 (27)                    | 0.672          |
|                                                | C1.12 I experience physical discomfort when I am under stress       | 22 (39)                       | 55 (66)                    | <0.001         |
|                                                | C1.13 I smoke cigarettes                                            | 4 (7)                         | 5 (6)                      | 0.818          |
|                                                | C1.14 It is a burden to participate in family caretaking activities | 15 (26)                       | 50 (60)                    | <0.001         |
|                                                | C1.15 I have difficulty with my vision                              | 42 (74)                       | 69 (83)                    | 0.192          |
|                                                | C1.16 I feel stress, tension, or pressure                           | 28 (49)                       | 53 (64)                    | 0.04           |
|                                                | C1.17 I worry a lot                                                 | 15 (26)                       | 30 (36)                    | 0.217          |

|                                                                          |                                                            |         |         |       |
|--------------------------------------------------------------------------|------------------------------------------------------------|---------|---------|-------|
| FHPAST – C2 <sup>b</sup><br>General Well-Being<br>and Self<br>Confidence | C2.1 I feel good about myself                              | 33 (58) | 40 (48) | 0.142 |
|                                                                          | C2.2 I feel in control of my life                          | 18 (32) | 8 (10)  | 0.008 |
|                                                                          | C2.3 I feel good about the decisions I make                | 15 (26) | 19 (23) | 0.950 |
|                                                                          | C2.4 I like the way I look                                 | 0       | 0       | 0     |
|                                                                          | C2.5 I am happy with my life                               | 50 (88) | 54 (65) | 0.001 |
|                                                                          | C2.6 I am hopeful about the future                         | 40 (70) | 45 (54) | 0.119 |
|                                                                          | C2.7 I am satisfied with my problem-solving ability        | 42 (74) | 57 (69) | 0.795 |
|                                                                          | C2.8 I am able to cope with stresses in my life            | 45 (79) | 51 (64) | 0.008 |
|                                                                          | C2.9 I consider myself to be healthy                       | 45 (79) | 48 (58) | 0.059 |
|                                                                          | C2.10 I am able to adjust to changes in my life            | 46 (81) | 62 (75) | 0.674 |
|                                                                          | C2.11 I have enough energy for activities of daily living  | 26 (46) | 13 (16) | 0.003 |
|                                                                          | C2.12 I am satisfied with my social life                   | 3 (5)   | 3 (4)   | 0.650 |
|                                                                          | C2.13 I am in excellent health                             | 3 (5)   | 3 (4)   | 0.650 |
|                                                                          | C2.14 I heal easily                                        | 22 (37) | 40 (48) | 0.263 |
|                                                                          | C2.15 I am able to learn new information easily            | 25 (44) | 25 (30) | 0.167 |
|                                                                          | C2.16 I feel comfortable with the role I play in my family | 39 (68) | 59 (71) | 0.484 |
|                                                                          | C2.17 I fall asleep without a problem                      | 21 (37) | 25 (30) | 0.241 |
|                                                                          | C2.18 I feel I can easily communicate with others          | 19 (33) | 20 (24) | 0.243 |
|                                                                          | C2.19 I can concentrate for a long period of time          | 12 (21) | 11 (13) | 0.461 |
|                                                                          | C2.20 I feel rested when I awake                           | 4 (7)   | 4 (5)   | 0.598 |
|                                                                          | C2.21 I feel comfortable with my weight                    | 19 (33) | 16 (19) | 0.150 |

|                                                                           |                                                                      |         |         |        |
|---------------------------------------------------------------------------|----------------------------------------------------------------------|---------|---------|--------|
| FHPAST – C3 <sup>c</sup><br>Health Promotion/<br>Protective<br>Activities | C2.22 The choices I make about my life are consistent with my values | 46 (81) | 53 (64) | 0.069  |
|                                                                           | C2.23 I am satisfied with what I do for work                         | 0       | 0       | 0      |
|                                                                           | C2.24 I feel comfortable expressing my feelings and emotions         | 38 (67) | 38 (46) | 0.005  |
|                                                                           | C2.25 I have someone I can talk to when I need help/support          | 30 (53) | 48 (58) | 0.370  |
|                                                                           | C2.26 I am comfortable with my sexuality                             | 0       | 0       | 0      |
|                                                                           | C2.27 I am able to hear clearly                                      | 26 (46) | 41 (49) | 0.663  |
|                                                                           | C3.1 I have an annual health examination                             | 21 (37) | 29 (35) | 0.819  |
|                                                                           | C3.2 I am able to follow recommendations from my healthcare provider | 36 (63) | 36 (43) | 0.021  |
|                                                                           | C3.3 I intentionally limit my dietary fat intake                     | 42 (74) | 29 (35) | <0.001 |
|                                                                           | C3.4 I eat five to six servings of fruits and vegetables daily       | 18 (32) | 46 (55) | 0.001  |
|                                                                           | C3.5 I seek immediate attention for changes in my health             | 30 (53) | 20 (24) | 0.002  |
|                                                                           | C3.6 I wear a seat belt                                              | 0       | 0       | 0      |
|                                                                           | C3.7 My health is important to me                                    | 46 (83) | 75 (90) | 0.193  |
|                                                                           | C3.8 Religious/ spiritual practices give meaning to my life          | 36 (63) | 55 (66) | 0.707  |
|                                                                           | C3.9 I avoid the sun or use sunscreen                                | 0       | 0       | 0      |
|                                                                           | C3.10 I drink six to eight glasses of water daily                    | 4 (7)   | 17 (21) | 0.071  |
|                                                                           | C3.11 I can make changes in my lifestyle to improve my health        | 15 (26) | 19 (23) | 0.399  |
|                                                                           | C3.12 I do aerobic exercise for 20 min 23 or more times a week       | 12 (21) | 15 (18) | 0.396  |

|                                                                    |         |         |       |
|--------------------------------------------------------------------|---------|---------|-------|
| C3.13 I have a usual<br>routine that I perform to<br>help me relax | 44 (77) | 51 (61) | 0.016 |
|--------------------------------------------------------------------|---------|---------|-------|

Notes: Variables in bold are significant at  $p < 0.05$ . FHPAST - C1<sup>a</sup> (Functional Health Patterns Assessment Screening Tool – component 1); FHPAST - C2<sup>b</sup> (Functional Health Patterns Assessment Screening Tool – component 2); FHPAST - C3<sup>c</sup> (Functional Health Patterns Assessment Screening Tool – component 3).
